45. Aspell JE, Heydrich L, Marillier G, Lavanchy T, Herbelin B, Blanke O: Turning body and self inside out: Visualized heartbeats alter bodily self-consciousness and tactile perception. *Psychol Sci* 2013; 24:2445–53
46. Leslie K, Sleight J, Paech MJ, Voss L, Lim CW, Sleight C: Dreaming and electroencephalographic changes during anesthesia maintained with propofol or desflurane. *ANESTHESIOLOGY* 2009; 111:547–55
47. Alkire MT, Gruver R, Miller J, McReynolds JR, Hahn EL, Cahill L: Neuroimaging analysis of an anesthetic gas that blocks human emotional memory. *Proc Natl Acad Sci USA* 2008; 105:1722–7
48. Ghoneim MM, Block RI, Haffarnan M, Mathews MJ: Awareness during anesthesia: Risk factors, causes and sequelae: A review of reported cases in the literature. *Anesth Analg* 2009; 108:527–35
49. Noreika V, Jylhänkangas L, Móró L, Valli K, Kaskinoro K, Aantaa R, Scheinin H, Revonsuo A: Consciousness lost and found: Subjective experiences in an unresponsive state. *Brain Cogn* 2011; 77:327–34
50. Koubeissi MZ, Bartolomei F, Beltagy A, Picard F: Electrical stimulation of a small brain area reversibly disrupts consciousness. *Epilepsy Behav* 2014; 37:32–5
51. Demertzi A, Soddu A, Laureys S: Consciousness supporting networks. *Curr Opin Neurobiol* 2013; 23:239–44

## ANESTHESIOLOGY REFLECTIONS FROM THE WOOD LIBRARY-MUSEUM

### Of Blurbs and Bromides—Gelett Burgess Asks, “Are You a Bromide?”

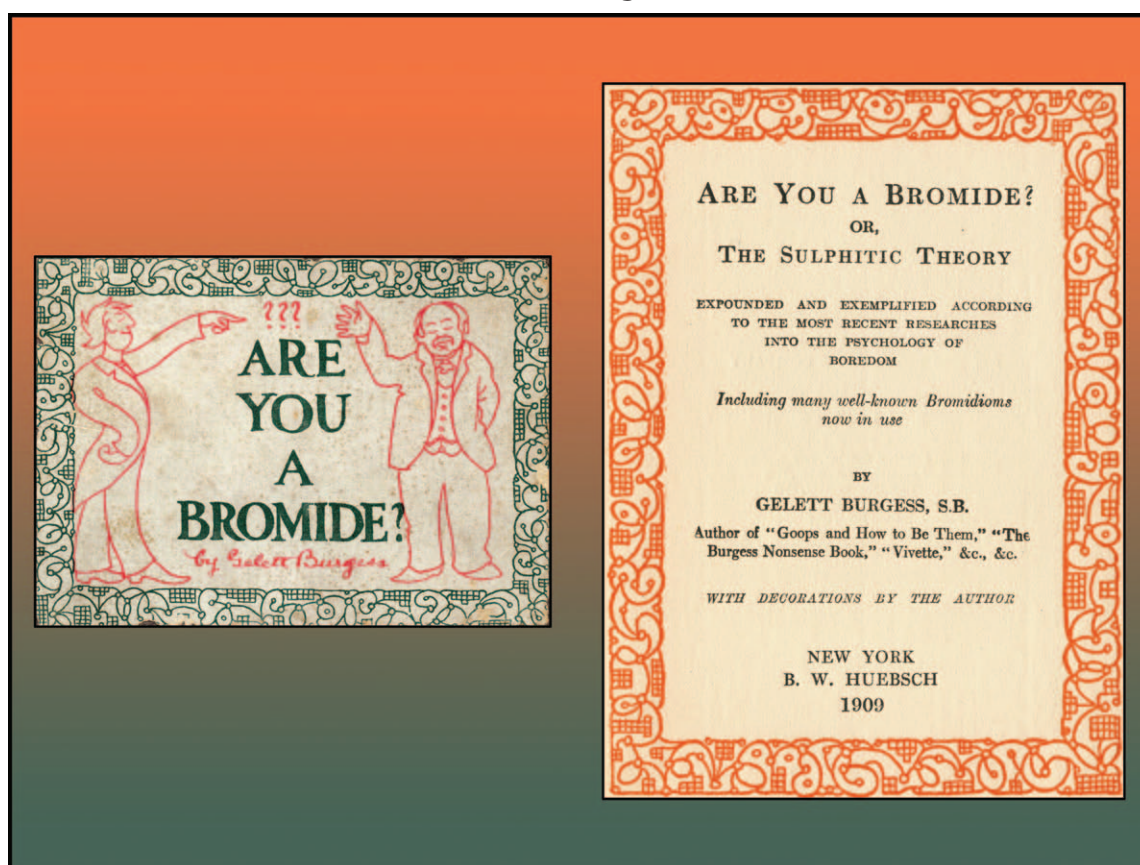

From 1906 to 1913, American humorist Gelett Burgess (1866–1951) published annual editions of his book *Are You a Bromide?* The cover (left) and title page (right) were frequently dust-jacketed with “Blinda Blurb,” a buxom cartoon drawn by Burgess to illustrate a “blurb,” the word he coined to mean an excessive laudatory testimonial that a publisher added to dustjackets to sell more books. In the book’s title, from the original association with a class of calming drugs, the word “bromide” had evolved to refer to an unoriginal, ineffective, or trite expression designed to placate a situation. Whether unoriginal or original, the pharmaceutical industry has supplied a bonanza of bromides for anesthesiologists’ clinical use: bromides of ethyl, glycopyrronium, pancuronium, pipecuronium, rapacuronium, rocuronium, succinylcholine, vecuronium, *etc.* And investigations into possible “bromism” (sluggishness, disinhibition, irritability, depression, *etc.*) have been prompted by exposure to bromides as diverse as pyridostigmine and dextromethorphan. (Copyright © the American Society of Anesthesiologists, Inc.)

George S. Bause, M.D., M.P.H., Honorary Curator, ASA’s Wood Library-Museum of Anesthesiology, Schaumburg, Illinois, and Clinical Associate Professor, Case Western Reserve University, Cleveland, Ohio. UJYC@aol.com.
